# Supplementary material
Source: PubMed Central journal article supplement (PMC5035707)

# Median Eosinophil Count

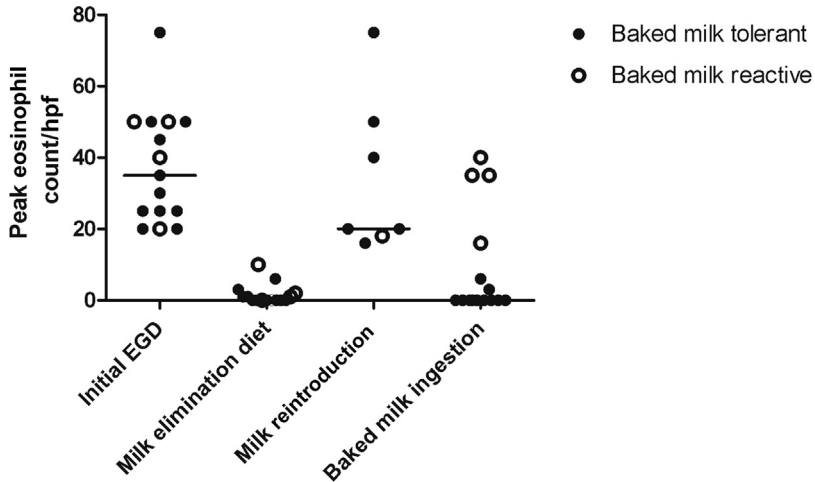

Supplement: NIHMS816118-supplement-figureE1.pdf [file NIHMS816118-supplement-figureE1.pdf]
